# Supplementary material
Source: publisher figshare collection journal article supplement (https://sage.figshare.com/ndownloader/files/22659731)
Supplement: Supplementary file 1 [file 22659731]

# **The Changing Role of Social Capital During the Venture Creation Process: A Multilevel study**

## **- *Supplementary Results Appendix* -**

**Johannes Kleinhempel\***

**Sjoerd Beugelsdijk<sup>†</sup>**

**Mariko J. Klasing<sup>‡</sup>**

---

\* University of Manchester, Alliance Manchester Business School, Booth St West, M15 6PB Manchester. E-Mail Address: johannes.kleinhempel@manchester.ac.uk.

<sup>†</sup> University of Groningen, Faculty of Economics & Business, PO Box 800, 9700 AV Groningen, The Netherlands. E-Mail Address: s.beugelsdijk@rug.nl.

<sup>‡</sup> University of Groningen, Faculty of Economics & Business, PO Box 800, 9700 AV Groningen, The Netherlands. E-Mail Address: m.j.klasing@rug.nl.

Table 1: Sequential logit model: Replication of the main estimations

|                                     | Sequential logit model                                 |                    |                                                   |                    |                                                        |                    |
|-------------------------------------|--------------------------------------------------------|--------------------|---------------------------------------------------|--------------------|--------------------------------------------------------|--------------------|
|                                     | Comparison 1:<br>Never thought about it<br>vs. further |                    | Comparison 2:<br>Pre-establishment vs.<br>further |                    | Comparison 3:<br>Young vs. established<br>entrepreneur |                    |
| <i>Individual-level controls</i>    |                                                        |                    |                                                   |                    |                                                        |                    |
| Age                                 | 1.036***<br>(.000)                                     | 1.037***<br>(.000) | 1.305***<br>(.000)                                | 1.305***<br>(.000) | 1.272***<br>(.000)                                     | 1.269***<br>(.000) |
| Age squared                         | 0.999***<br>(.000)                                     | 0.999***<br>(.000) | 0.998***<br>(.000)                                | 0.998***<br>(.000) | 0.998***<br>(.000)                                     | 0.998***<br>(.000) |
| Gender (Male)                       | 2.448***<br>(.000)                                     | 2.453***<br>(.000) | 1.841***<br>(.000)                                | 1.834***<br>(.000) | 1.200**<br>(.035)                                      | 1.199**<br>(.035)  |
| Educational attainment              | 1.318***<br>(.000)                                     | 1.309***<br>(.000) | 1.034<br>(.538)                                   | 1.041<br>(.458)    | 0.884**<br>(.027)                                      | 0.886**<br>(.030)  |
| Parental self-employment            | 1.714***<br>(.000)                                     | 1.709***<br>(.000) | 1.657***<br>(.000)                                | 1.649***<br>(.000) | 1.176**<br>(.014)                                      | 1.185***<br>(.010) |
| <i>Regional-level controls</i>      |                                                        |                    |                                                   |                    |                                                        |                    |
| ln GDP per capita                   |                                                        | 0.988<br>(.911)    |                                                   | 1.023<br>(.903)    |                                                        | 0.425***<br>(.007) |
| Human capital                       |                                                        | 0.928<br>(.128)    |                                                   | 0.907<br>(.243)    |                                                        | 1.322*<br>(.077)   |
| Share of employment in R&D          |                                                        | 1.018<br>(.695)    |                                                   | 1.111*<br>(.070)   |                                                        | 1.233**<br>(.036)  |
| Unemployment rate                   |                                                        | 0.992<br>(.291)    |                                                   | 0.992<br>(.498)    |                                                        | 1.022<br>(.264)    |
| Share of employment in industry     |                                                        | 0.203***<br>(.000) |                                                   | 0.612<br>(.305)    |                                                        | 6.230**<br>(.036)  |
| Population density                  |                                                        | 1.000**<br>(.012)  |                                                   | 1.000***<br>(.005) |                                                        | 1.000*<br>(.057)   |
| Share of population aged<br>18 - 35 |                                                        | 1.072<br>(.950)    |                                                   | 0.287<br>(.487)    |                                                        | 0.003**<br>(.032)  |
| <i>Regional-level predictor</i>     |                                                        |                    |                                                   |                    |                                                        |                    |
| Regional social capital             | 1.014<br>(.820)                                        | 1.080<br>(.169)    | 1.416***<br>(.000)                                | 1.384***<br>(.001) | 1.149<br>(.217)                                        | 1.140<br>(.275)    |
| Country Fixed Effects               |                                                        |                    |                                                   | YES                |                                                        |                    |
| Year Fixed Effects                  |                                                        |                    |                                                   | YES                |                                                        |                    |
| Observations                        |                                                        |                    |                                                   | 22,878             |                                                        |                    |
| Number of regions                   |                                                        |                    |                                                   | 110                |                                                        |                    |
| Number of Countries                 |                                                        |                    |                                                   | 22                 |                                                        |                    |

*Table 2: Sequential logit model: Connected and isolated regional social capital*

|                                         | Sequential logit model                                 |                                                   |                                                        |
|-----------------------------------------|--------------------------------------------------------|---------------------------------------------------|--------------------------------------------------------|
|                                         | Comparison 1:<br>Never thought about it<br>vs. further | Comparison 2:<br>Pre-establishment vs.<br>further | Comparison 3:<br>Young vs. established<br>entrepreneur |
| <b><i>Individual-level controls</i></b> |                                                        |                                                   |                                                        |
| Age                                     | 1.037***<br>(.000)                                     | 1.304***<br>(.000)                                | 1.269***<br>(.000)                                     |
| Age squared                             | 0.999***<br>(.000)                                     | 0.998***<br>(.000)                                | 0.998***<br>(.000)                                     |
| Gender (Male)                           | 2.453***<br>(.000)                                     | 1.836***<br>(.000)                                | 1.200**<br>(.035)                                      |
| Educational attainment                  | 1.309***<br>(.000)                                     | 1.041<br>(.462)                                   | 0.887**<br>(.031)                                      |
| Parental self-employment                | 1.709***<br>(.000)                                     | 1.650***<br>(.000)                                | 1.186***<br>(.010)                                     |
| <b><i>Regional-level controls</i></b>   |                                                        |                                                   |                                                        |
| ln GDP per capita                       | 0.971<br>(.788)                                        | 0.993<br>(.968)                                   | 0.411***<br>(.006)                                     |
| Human capital                           | 0.923<br>(.123)                                        | 0.881<br>(.131)                                   | 1.312*<br>(.081)                                       |
| Share of employment in R&D              | 1.018<br>(.697)                                        | 1.110*<br>(.076)                                  | 1.240**<br>(.035)                                      |
| Unemployment rate                       | 0.991<br>(.249)                                        | 0.990<br>(.369)                                   | 1.020<br>(.305)                                        |
| Share of employment in industry         | 0.186***<br>(.000)                                     | 0.427<br>(.105)                                   | 5.848*<br>(.053)                                       |
| Population density                      | 1.000***<br>(.008)                                     | 1.000***<br>(.005)                                | 1.000*<br>(.060)                                       |
| Share of population aged<br>18 - 35     | 0.932<br>(.950)                                        | 0.200<br>(.370)                                   | 0.002**<br>(.024)                                      |
| <b><i>Regional-level predictor</i></b>  |                                                        |                                                   |                                                        |
| Connected regional social capital       | 1.096<br>(.131)                                        | 1.350***<br>(.001)                                | 1.140<br>(.334)                                        |
| Isolated regional social capital        | 0.988<br>(.743)                                        | 1.030<br>(.621)                                   | 0.961<br>(.739)                                        |
| Country Fixed Effects                   |                                                        | YES                                               |                                                        |
| Year Fixed Effects                      |                                                        | YES                                               |                                                        |
| Observations                            |                                                        | 22,878                                            |                                                        |
| Number of regions                       |                                                        | 110                                               |                                                        |
| Number of Countries                     |                                                        | 22                                                |                                                        |

*Table 3: Robustness checks sequential logit regression*

| Model | Further analysis                                                                                                                       | Variable of interest              | Comparison 1:<br>Never thought about it<br>vs. further | Comparison 2:<br>Pre-establishment<br>vs. further | Comparison 3:<br>Young vs. established<br>entrepreneur |
|-------|----------------------------------------------------------------------------------------------------------------------------------------|-----------------------------------|--------------------------------------------------------|---------------------------------------------------|--------------------------------------------------------|
| 1     | Additional control variable:<br>Individual-level social capital                                                                        | Individual-level social capital   | 2.632*** (.000)                                        | 1.417*** (.000)                                   | 0.412*** (.000)                                        |
|       |                                                                                                                                        | Regional social capital           | 1.069 (.252)                                           | 1.425*** (.001)                                   | 1.215 (.126)                                           |
| 2     | Alternative functional form:<br>Potential non-linear effect                                                                            | Regional social capital           | 1.080 (.157)                                           | 1.383*** (.001)                                   | 1.138 (.276)                                           |
|       |                                                                                                                                        | Regional social capital - squared | 0.965 (.447)                                           | 0.948 (.424)                                      | 1.028 (.777)                                           |
| 3     | Alternative sub-sample estimation:<br>Excluding the financial crisis (2010 survey)                                                     | Regional social capital           | 0.989 (.896)                                           | 1.554*** (.000)                                   | 1.274** (.041)                                         |
| 4     | Additional control variable:<br>Regional differences in access to finance                                                              | Regional social capital           | 1.067 (.269)                                           | 1.380*** (.008)                                   | 1.181 (.213)                                           |
| 5     | Alternative estimation method: 3-level multi-level<br>model with country-level control variables                                       | Regional social capital           | 1.016 (.879)                                           | 1.367** (.063)                                    | 1.142 (.322)                                           |
| 6     | Alternative estimation method:<br>Single-level logit model with cluster robust standard<br>errors clustered at the regional level      | Regional social capital           |                                                        | not relevant                                      |                                                        |
| 7     | Alternative process assessment:<br>Using pairwise comparisons                                                                          | Regional social capital           |                                                        | not relevant                                      |                                                        |
| 8     | Alternative process assessment:<br>Sequential logit model with cluster robust standard<br>errors clustered at the regional level       | Regional social capital           |                                                        | not relevant                                      |                                                        |
| 9     | Alternative operationalization of regional social<br>capital: Considering only voluntary work in<br>associations ("active engagement") | Regional "active" social capital  | 1.053* (.072)                                          | 1.141*** (.004)                                   | 1.059 (.462)                                           |

Note: Exact p-values presented in parentheses. \*\*\* p<0.01, \*\* p<0.05, \* p<0.1. All models are estimated using the same control variables as in the main model but are not reported for brevity. Sample and group sizes are the same as in the main specification unless reported otherwise.

Note on model 2: Regional social capital and regional social capital-squared are highly correlated (.94). To generate a measure of the squared term that is uncorrelated with regional social capital, we regress regional social capital squared on regional social capital and predict the residuals. We then enter these residuals as a substitute for regional social capital-squared into the model. We also directly regressed both the linear and the squared term of regional social capital on the three dependent variables, which also did not indicate the presence of an inverse U-shape for any comparison. This is further supported by likelihood-ratio tests comparing the presented model –including squared term- to our main specification –without squared term- which give no indication of a significant improvement of model fit.

Note on model 3: Number of observations nested in 94 regions and 22 countries: Comparison 1: 14825; comparison 2: 4,986, and comparison 3: 2,602. Alternatively, we also re-ran our baseline model with country, year, and country-year fixed effects to capture time-varying cross-country differences. This check also confirmed that our results are not driven by the occurrence of the financial crisis.

Note on model 4: The regional aggregation level changed as a result of the higher aggregation used in the REDI data. Number of observations nested in 83 regions and 22 countries: Comparison 1: 20,688 comparison 2: 6,643 and comparison 3: 3,540.
